# Supplementary material
Source: Springer Nature journal article supplement (https://www.springermedizin.de/resource/supplementary/12886_2012_286_MOESM2_ESM.pdf/9473744)

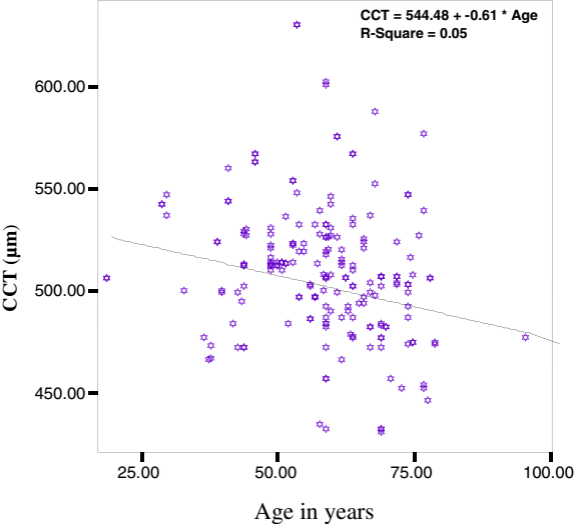

Supplement: MOESM2 [file 9473744]
